# Computational systems biology of the cell cycle

Attila Csikász-Nagy

Submitted: 2nd December 2008; Received (in revised form): 21st January 2009

## Abstract

One of the early success stories of computational systems biology was the work done on cell-cycle regulation. The earliest mathematical descriptions of cell-cycle control evolved into very complex, detailed computational models that describe the regulation of cell division in many different cell types. On the way these models predicted several dynamical properties and unknown components of the system that were later experimentally verified/identified. Still, research on this field is far from over. We need to understand how the core cell-cycle machinery is controlled by internal and external signals, also in yeast cells and in the more complex regulatory networks of higher eukaryotes. Furthermore, there are many computational challenges what we face as new types of data appear thanks to continuing advances in experimental techniques. We have to deal with cell-to-cell variations, revealed by single cell measurements, as well as the tremendous amount of data flowing from high throughput machines. We need new computational concepts and tools to handle these data and develop more detailed, more precise models of cell-cycle regulation in various organisms. Here we review past and present of computational modeling of cell-cycle regulation, and discuss possible future directions of the field.

**Keywords:** *cell cycle; computational modeling; historical review; perspectives; systems biology*

## INTRODUCTION

Computational systems biology is rather a new science [82] although its roots can be found in theoretical and mathematical biology. This can be nicely observed in the field of cell-cycle modeling: from the 1960s we can find mathematical models that try to explain some key aspects of cell-cycle regulation from phenomenological observations [3, 5, 6]. The field really started to explode in the early 1990s [42, 65, 71, 73] when some data on the underlying molecular regulatory network came to light [83]. In recent years, with the birth of systems biology, new experimental techniques have led to an extension of these models, and there now appears to be a bright future for models of cell-cycle regulation.

Several excellent reviews are available on computational modeling techniques [84, 85], on cell-cycle regulation [86–88] and even on cell-cycle modeling [89–93], thus we will not go over the same ground here. Rather we review the key advances

that cell-cycle modeling gave us and discuss directions the research might go in the future.

## CELL-CYCLE REGULATION IN BRIEF

Cell cycle refers to a sequence of events that leads to correct duplication of cells [86]. During this process a cell must replicate its DNA (in S-phase) and properly distribute the two copies into two daughter nuclei during mitosis (M-phase) before the cell divides. During this time the cell need to double all its other components (proteins, ribosomes, etc.) to keep the size of daughter cells similar to that of the mother. Cells introduce two gap phases (G1 and G2) between S and M-phases to ensure that overall cell mass doubling is coordinated with the DNA replication-division cycle (Figure 1). A complex regulatory network controls the proper order of cell-cycle events. The core controllers of this network in all eukaryotes are complexes of Cdk and cyclin

Attila Csikász-Nagy, The Microsoft Research – University of Trento Centre for Computational and Systems Biology, Piazza Mancini 17, Povo-Trento I-38100, Italy. Tel: +39 0461 882824; Fax: +39 0461 882814; E-mail: csikasz@cosbi.eu

**Attila Csikász-Nagy** is a Researcher at CoSBI. His main research interest focuses on computational modeling of cell cycle and cell growth regulation.

molecules. Various Cdk/cyclin pairs regulate the critical transitions of the cell cycle. They initiate DNA replication at the transition from G1 to S-phase, and they play key roles in inducing mitosis as well. In addition, Cdk/cyclin inhibits the last steps of the cycle, the separation of the chromosomes at the end of mitosis and cell division (Figure 1). Key cell-cycle transitions are regulated by checkpoints, which ensure that cells start DNA synthesis only if nutrients and growth factors are present, that mitosis can happen only after DNA replication is properly finished, and that chromosomes can separate only if mitotic spindles are intact (Figure 1). In case there is a problem, the checkpoint signals

to the core Cdk/cyclin module and inhibits the further steps of the cycle [94].

### HISTORY OF CELL-CYCLE MODELING

As mentioned above the story goes back about 50 years, when Prescott found that cells need to reach a critical size to divide [95]. This and other phenomenological observations drove the first wave of mathematical models that tried to understand how cell division is connected to cell growth (Table 1). Once the molecular interactions that control the cell cycle were discovered many groups started to work on mathematical models to figure out the key concepts of these interactions (Table 1). The group of Béla Novák and John J. Tyson stands out from the rest as they produced ~40 papers on cell-cycle regulation, some of which have become benchmarks of computational systems biology. In 1993 they investigated the regulation of mitotic entry in eggs of the frog *Xenopus laevis* and found that a model with two positive feedback loops could provide a reliable switch for entry into mitosis [43]. Their model predicted that the Cdk control system can be bistable: under certain conditions, Cdk may be either active or inactive depending on the recent history of the cell. This bistability and hysteresis was verified experimentally 10 years later [96, 97]. The same group put together the most detailed model (so far) of cell-cycle regulation by describing the Cdk control network in budding yeast *Saccharomyces cerevisiae*. In the first version of the model they proposed that a different hysteretic switch controlled the entry into S phase [21]. This prediction and

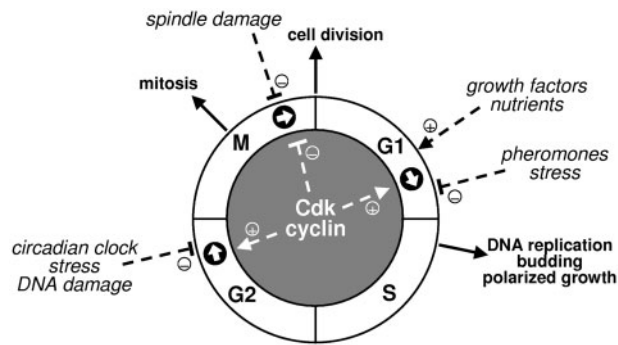

**Figure 1:** Regulation of the cell cycle. The core cell-cycle machinery is controlled by the activity of Cdk/cyclin complexes, which activate the G1-S and G2-M transitions but inhibit the M-G1 transition (labeled by thick white arrows). These transitions are also controlled by external and internal signals (black, dashed lines). Downstream cell-cycle processes are induced by the core machinery (black, solid arrows).

**Table 1:** Computational models of cell-cycle regulation

| Modeling methodology                 | References to models                                                      |                        |                               |                             |                                |                 |
|--------------------------------------|---------------------------------------------------------------------------|------------------------|-------------------------------|-----------------------------|--------------------------------|-----------------|
|                                      | Investigated organisms                                                    |                        |                               |                             |                                |                 |
|                                      | Prokaryotes                                                               | Single cell eukaryotes |                               | Multi-cellular eukaryotes   | Generic                        |                 |
|                                      | Caulobacter                                                               | Budding yeast          | Fission yeast                 | Frog, Sea urchin, Fly       | Mammalian<br>General eukaryote |                 |
| Phenomenological models              |                                                                           |                        |                               |                             | [1–8]                          |                 |
| Molecular interaction network models | Logical (Boolean)<br>Deterministic (ODE)<br>Stochastic (Langevine or SSA) | [16–18]                | [9–13]<br>[19–29]<br>[76, 77] | [14]<br>[30–37]<br>[78, 79] | [38–46]<br>[47–62]<br>[80]     | [63–75]<br>[81] |

Models can be sorted by the organisms they investigate (columns) and by the modeling method they use (rows). See text for description.

others were tested experimentally by Fred Cross's group of in a seminal paper that might be the first case when molecular genetics lab focused solely on verifying a mathematical model of cell-cycle regulation [98]. Later the groups joined forces to create a model that can simulate the behavior of more than 120 mutants [22]. This model also predicted the existence and regulation of a phosphatase that later was identified [99]. Recently other groups have presented their own models of the budding yeast cell cycle, focusing on various aspects of the regulatory system [10, 19, 26, 27].

The other favorite test organism of cell-cycle research is the fission yeast *Schizosaccharomyces pombe*, for which there exist models describing its DNA replication [31, 33], cell division [30] and the behavior of some interesting mutants [36, 79]. Embryonic cell cycles have been modeled not only in frogs but also in the fly, *Drosophila melanogaster* [45], and in the sea urchin [46]. The most challenging task is to model cell-cycle regulation in mammalian cells, where multiple control mechanisms exist that hold cells back from proliferation. The physiological differences among different types of mammalian cells make this task especially difficult. Cancer cell lines are often (possibly always) perturbed in their cell-cycle regulation [100], thus most existing models describe 'generic' proliferating mammalian cells at various levels of detail (Table 1). A few of these models use some data on mouse fibroblasts; still, no model of the cell-cycle network of a specific mammalian cell type has yet been constructed.

Several models exist that do not focus on any specific cell type but rather investigate some important aspects of the regulatory modules of the general Cdk control network (Table 1). These approaches are biologically suitable, since it has been shown that the key cell-cycle controllers and their interactions are universal among eukaryotes [83]. Recent modeling studies on cell-cycle regulation of the prokaryote *Caulobacter crescentus* show that, even though the key controller genes are completely unrelated to their eukaryotic counterparts, the network wiring resembles the eukaryotic system [16, 17]. This conservation of network structure underlines certain key features of cell-cycle regulation. Positive and negative feedback loops have to be wired together for proper cell-cycle regulation. The positive feedbacks are important for robust transitions between cell-cycle phases and they assure that checkpoints can stop progression through the

cell cycle, while the negative feedbacks are necessary to reset the system to the beginning and drive the periodic repetition of the process [101]. The significance of positive feedback in robustness of cell-cycle transitions has recently been shown in different organisms [102–104].

Most of the above mentioned models based on molecular networks use systems of ordinary differential equations (ODEs) to describe the dynamics of the system (Table 1). This allows the use of some mathematical analysis tools that can track the steady states and dynamical transitions of cell-cycle control system [20, 38, 58, 64]. As the complexity of the known cell-cycle regulatory network increased in the last few years, logical dynamic modeling [105] and especially Boolean algebra became another fashionable modeling formalism (Table 1). This might be partially influenced by the success of Li *et al.* [9], who showed in a logical model of the budding yeast cell cycle that trajectories from 86% of all possible initial states lead the system into one state representing G1-phase of the cell cycle. Most of these trajectories funneled into a path which steps through the different phases of the cell cycle, showing that the cell cycle is robustly designed.

Although some of these logical models were already using stochastic updating, recently some much more detailed formalisms have started to consider the effects of molecular noise in the cell-cycle regulatory network (Table 1). The two simulation methods that have been used for such models are Langevin-type stochastic ODEs and the exact stochastic simulation algorithm (SSA) [106]. These stochastic models can investigate how individual cells might differ from the average behavior of the population (the output of deterministic ODE models). Stochastic fluctuations could be relevant for certain mutant cell populations that show partial viability [76]. Furthermore, recent advances in experimental observations on single cells allow us to measure the distribution of behaviors in a population of cells, for example, the measurements of the noisiness of the G1/S transition in budding yeast cells provided by Cross's group [107, 108].

## EXPERIMENTAL ADVANCES THAT WILL HELP FUTURE MODELING

Single cell measurements and other new technologies enable us to develop much more detailed, quantitative models of cell-cycle regulation.

Mass spectrometry can provide data on protein level fluctuations during the cell cycle [109], identify members of important protein complexes [110], and tell the phosphorylation states of Cdk-regulated proteins [111–113]. Future targeted analysis of key cell-cycle components could provide invaluable data for modelers. Such time-course measurements are already available for mRNA fluctuations during the cell cycle of various organisms [114], but for a detailed qualitative model of cell-cycle regulators we need the time course data of various forms of the proteins as well. We also need to know how cell-cycle regulator molecules interact with each other and how they regulate transcription and translation. Genome-scale protein interaction databases [115, 116], phosphorylation network predictions [117], as well as specific cell-cycle regulatory interaction databases [118, 119] help us address these questions. In the case of budding yeast cells, microarray data on mRNA levels [120, 121] was used to computationally infer the transcriptional regulatory loops of cell-cycle regulation [122–125]. Recently, these methods started to incorporate ChIP-chip [126], mutant and other data types to provide a better prediction of the transcriptional network of cell-cycle regulation in budding yeast [127, 128]. Furthermore, some literature mining tools are available [129, 130] to search for specific experimental results on molecular interactions. All these resources support the development of more detailed, quantitative computational models.

Models have to be tested and fitted to physiological observations as well, not only in the case of wild type cells but in various mutants. Investigations on single or double gene-deletion strains [131–133] and phenotype analysis of protein overexpressing cells [134, 135] provide another kind of constraint for models. The phenotypes of these mutant strains have to be fitted by cell-cycle models. Earlier models were parameterized by fitting similar types of data on cell sizes, cell-cycle phase distributions and viabilities of mutants after painstaking literature mining [21, 22]. The above mentioned large-scale measurements will provide modelers with the data needed to formulate larger, more detailed, more precise models in the future.

## COMPUTATIONAL CHALLENGES

Comprehensive databases force modelers to face new challenges. They have to handle somehow this

huge amount of data, develop platforms to build large models, and find the suitable methods to analyze them. Conventional, hand-written systems of ODEs have been studied by numerical simulations, sensitivity analysis and bifurcation theory, in order to understand the model's behavior. As our knowledge base is growing, we have reached a point where we need new tools to build large models [136], to code them in a platform-free language [137] and to store them for community use [138, 139]. For example, cell-cycle models now have their own database with links to experimental data [140].

Several modeling platforms have been used in cell-cycle research [141–144]. These usually guide the user from model building to some type of analysis. JigCell has been developed precisely for cell-cycle model simulations and data fitting [144]. It can run multiple parameter sets to simulate various mutants and it includes a comparator that can test how well the simulations fit physiological details of mutants. Although it is difficult to define a suitable objective function for data that is not time dependent, JigCell provides tools for such estimations [145]. Indeed parameter optimization is one of the major challenges for modeling. High-throughput measurements rarely give reliable kinetic rates; most often they should be estimated from concentration profiles by a parameter optimization algorithm [146–150].

Search for missing rate values is just one part of the job that computational tools can do for us. All models we create are some abstractions of the real biological system, thus we know that we are missing some part of the whole network. Experimental data can also be used to infer yet unknown molecular interactions, propose existence of regulating proteins, etc. Some useful tools can handle such network data [151] and also some methods are developed that can help the search for missing interactions and to infer network topology [152–155]. Since high throughput data is available for cell cycle of various organisms now, we can start to think about how to fuse these data to measurements on single gene perturbations to achieve a detailed understanding of the system. The computational identification of cell-cycle-related transcription factors [127, 128] is a promising initial result on these lines.

Another layer of complexity in cell-cycle models is the matter of spatial distribution of regulatory molecules. Many crucial events happen in the

nucleus and many molecules are moved in/out of the nucleus during the cycle. Still only a few cell-cycle models consider compartmentalization of the cell [22, 59]. Even in compartmental models, diffusion and protein gradients are not considered, even though they might have important roles in regulation [156]. Simulation packages are available to deal with spatial distributions of proteins [157], but experimental data on protein localization during the cell cycle is too spotty to give meaningful constraints for such models.

A serious problem of spatial models with many interacting components could be the extensive computational time needed for simulations. Stochastic simulations face similar problems, in large models with many interacting components the calculations could slow down dramatically. In both cases, we need reliable methods for speeding up the simulations. In the case of stochastic simulations, there is a promising idea, based on the total quasi-steady-state assumption of enzyme kinetics [158], for handling the coupled enzymatic reactions that are implied by the positive and negative feedback loops of the cell-cycle network [159, 160]. This and other methods [106] that decouple different time-scales can help us to handle stochastic noise in larger models in the future.

Other advances in the field of model analysis will extend the reach of bifurcation analysis, for tracking qualitative changes in the dynamics of a system on ODEs [64], and sensitivity analysis, for identifying parameter combinations that crucially determine specific aspects of a simulation [161]. Recently biological modeling has been enriched by some new concepts that help to decompose cell-cycle models into sub-networks [162], find the exact timing of cell-cycle transitions [25] and check the irreversibility of these transitions [163]. The last example uses a model-checking approach developed by computer scientists, and it is based on the automated verification of properties of the modeled systems that are encoded using some temporal logic formulae to verify if a system can reach a given state. This approach has opened some new and interesting research lines in biological modeling [164–167].

Some other interesting concepts have invaded biological modeling from computer science. Rule-based modeling [168, 169] and especially various process algebras [170–173] were proposed to circumvent the problem of combinatorial complexity

caused by modeling the nested network of multisite modification processes and multi-component complex formations, which are both relevant issues for cell-cycle models [174, 175]. The Beta Workbench modeling environment was developed to handle this type of problem with a biologically friendly computational language based on process algebra [141, 176]. This tool has been thoroughly tested and extended to handle large-scale models of cell-cycle regulation.

## OPEN QUESTIONS

Evidently, the core regulatory machinery of the cell cycle is quite well understood, thanks to experimental and theoretical research over the last few decades. The main challenge for the future is to put this core cell-cycle machinery into larger contexts of cell physiology, and to figure out, for example, how a cell copes with problems at checkpoints, how it responds to environmental changes, why some cells leave the cell cycle and commit suicide, etc. As Figure 1 shows the core cell-cycle module is regulated by several incoming signals and it drives several downstream events. The duty of this central controller is to process the information it receives and decide how to handle DNA replication and nuclear division. Current models use some parameters as incoming signals and can tell how this input determines the timing of cell-cycle events. Some models already investigate how the circadian clock interacts with the cell-cycle machinery [80, 177, 178] and how the cell-cycle is regulated in response to checkpoint signals [23, 48, 51, 179]. These models are very detailed either on the cell-cycle machinery or on the signaling network, but comprehensive models that incorporate both control systems in detail do not exist yet.

Several models are available for pathways that signal to the cell-cycle machinery the presence of nutrients, pheromones, stress inducing agents, etc. [180–186]. These could be merged with appropriate cell-cycle models to reveal if our current knowledge of the signaling pathway—cell-cycle network interactions is indeed complete. Similarly, many other biological pathways have been proposed to interact with the cell cycle, such as polarized growth [187], the NF- $\kappa$ B pathway [188], p53 regulation [189]. While computational models also exist for these processes [190–193], they have yet to be connected to cell-cycle models and to each other.

Another perspective is to step up from the single cell level and simulate how cell-to-cell interactions alter cell proliferation at the tissue level. This requires multi-scale parallel handling of the cell-cycle controls within individual cells while simulating their interactions through signaling at the same time. For this problem we need, first of all, reliable cell-cycle models for animal cells, desirably specific models of specific cell types, and in addition we need experimental measurements on the signaling between cells. Such detailed models are far in the future, but we already can learn from some models that take steps in this direction [194–197].

These steps lead us to the major future goal: to understand how perturbations of the human cell-cycle machinery lead to tumor formation. Indeed mathematical modeling of cancer development is another active research field [198–201]. Various ideas exist on how to handle tissue growth computationally [202–204]. Predictive cell-cycle models embedded into complex tissue models can help us in the future to understand the dynamics of cancer formation.

### Key Points

- Cell-cycle modeling is one of the early success stories of computational systems biology.
- Systems biology is bringing new types of experimental data to the field.
- We need new computational tools to handle these challenges.
- Cell-cycle modeling will expand, to encompass the pathways that connect to the core machinery, and to investigate the regulation of cell division in tissues and organs.

### Acknowledgements

I am thankful to my great tutors, Béla Novák and John J. Tyson for introducing me to this field and for their constant support. I am grateful to colleagues at CoSBI, especially Ivan Mura, Corrado Priami and Sean Sedwards for their useful comments on this manuscript.

### FUNDING

Italian Ministry of University and Research, FIRB (RBPR0523C3).

### References

1. Brooks RF, Bennett DC, Smith JA. Mammalian cell cycles need two random transitions. *Cell* 1980;**19**:493–504.
2. Castor LN. A G1 rate model accounts for cell-cycle kinetics attributed to ‘transition probability’. *Nature* 1980;**287**:857–59.
3. Koch AL, Schaechter M. A model for statistics of the cell division process. *J Gen Microbiol* 1962;**29**:435–54.
4. Koch AL. Does the variability of the cell cycle result from one or many chance events? *Nature* 1980;**286**:80–2.
5. Shields R. Transition probability and the origin of variation in the cell cycle. *Nature* 1977;**267**:704–7.
6. Smith JA, Martin L. Do cells cycle? *Proc Natl Acad Sci USA* 1973;**70**:1263–67.
7. Tyson JJ. Unstable activator models for size control of the cell cycle. *J Theor Biol* 1983;**104**:617–31.
8. Tyson JJ, Hannsgen KB. Cell growth and division: a deterministic/probabilistic model of the cell cycle. *J Math Biol* 1986;**23**:231–46.
9. Li F, Long T, Lu Y, *et al.* The yeast cell-cycle network is robustly designed. *Proc Natl Acad Sci USA* 2004;**101**:4781–86.
10. Braunewell S, Bornholdt S. Superstability of the yeast cell-cycle dynamics: ensuring causality in the presence of biochemical stochasticity. *J Theor Biol* 2007;**245**:638–43.
11. Stoll G, Rougemont J, Naef F. Few crucial links assure checkpoint efficiency in the yeast cell-cycle network. *Bioinformatics* 2006;**22**:2539–46.
12. Okabe Y, Sasai M. Stable stochastic dynamics in yeast cell cycle. *Biophys J* 2007;**93**:3451–59.
13. Han B, Wang J. Quantifying robustness and dissipation cost of yeast cell cycle network: the funneled energy landscape perspectives. *Biophys J* 2007;**92**:3755–63.
14. Davidich MI, Bornholdt S. Boolean network model predicts cell cycle sequence of fission yeast. *PLoS ONE* 2008;**3**:e1672.
15. Faure A, Naldi A, Chaouiya C, *et al.* Dynamical analysis of a generic Boolean model for the control of the mammalian cell cycle. *Bioinformatics* 2006;**22**:e124–31.
16. Brazhnik P, Tyson JJ. Cell cycle control in bacteria and yeast: a case of convergent evolution? *Cell Cycle* 2006;**5**:522–9.
17. Li S, Brazhnik P, Sobral B, *et al.* A quantitative study of the division cycle of *Caulobacter crescentus* stalked cells. *PLoS Comput Biol* 2008;**4**:e9.
18. Shen X, Collier J, Dill D, *et al.* Architecture and inherent robustness of a bacterial cell-cycle control system. *Proc Natl Acad Sci USA* 2008;**105**:11340–5.
19. Barberis M, Klipp E, Vanoni M, *et al.* Cell size at S phase initiation: an emergent property of the G1/S network. *PLoS Comput Biol* 2007;**3**:e64.
20. Battogtokh D, Tyson JJ. Bifurcation analysis of a model of the budding yeast cell cycle. *Chaos* 2004;**14**:653–61.
21. Chen KC, Csikasz-Nagy A, Györfy B, *et al.* Kinetic analysis of a molecular model of the budding yeast cell cycle. *Mol Biol Cell* 2000;**11**:369–91.
22. Chen KC, Calzone L, Csikasz-Nagy A, *et al.* Integrative analysis of cell cycle control in budding yeast. *Mol Biol Cell* 2004;**15**:3841–62.
23. Ciliberto A, Novak B, Tyson JJ. Mathematical model of the morphogenesis checkpoint in budding yeast. *J Cell Biol* 2003;**163**:1243–54.
24. Cross FR. Two redundant oscillatory mechanisms in the yeast cell cycle. *Dev Cell* 2003;**4**:741–52.
25. Lovrics A, Csikasz-Nagy A, Zsely IG, *et al.* Time scale and dimension analysis of a budding yeast cell cycle model. *BMC Bioinformatics* 2006;**7**:494.

26. Sriram K, Bernot G, Kepes F. A minimal mathematical model combining several regulatory cycles from the budding yeast cell cycle. *IET Syst Biol* 2007;**1**:326–41.
27. Stelling J, Gilles ED. Mathematical modeling of complex regulatory networks. *IEEE Trans Nanobioscience* 2004;**3**:172–9.
28. Thornton BR, Chen KC, Cross FR, *et al.* Cycling without the cyclosome: modeling a yeast strain lacking the APC. *Cell Cycle* 2004;**3**:629–33.
29. Lovrics A, Zsély IG, Csikász-Nagy A, *et al.* Analysis of a budding yeast cell cycle model using the shapes of local sensitivity functions. *International Journal of Chemical Kinetics* 2008;**40**:710–20.
30. Csikász-Nagy A, Kapuy O, Györfy B, *et al.* Modeling the septation initiation network (SIN) in fission yeast cells. *Curr Genet* 2007;**51**:245–55.
31. Lygeros J, Koutroumpas K, Dimopoulos S, *et al.* Stochastic hybrid modeling of DNA replication across a complete genome. *Proc Natl Acad Sci USA* 2008;**105**:12295–300.
32. Novak B, Tyson JJ. Quantitative analysis of a molecular model of mitotic control in fission yeast. *J Theor Biol* 1995;**173**:283–305.
33. Novak B, Tyson JJ. Modeling the control of DNA replication in fission yeast. *Proc Natl Acad Sci USA* 1997;**94**:9147–52.
34. Novak B, Csikász-Nagy A, Györfy B, *et al.* Mathematical model of the fission yeast cell cycle with checkpoint controls at the G1/S, G2/M and metaphase/anaphase transitions. *Biophys Chem* 1998;**72**:185–200.
35. Novak B, Pataki Z, Ciliberto A, *et al.* Mathematical model of the cell division cycle of fission yeast. *Chaos* 2001;**11**:277–86.
36. Sveiczler A, Csikász-Nagy A, Györfy B, *et al.* Modeling the fission yeast cell cycle: quantized cycle times in *wee1-cdc25Delta* mutant cells. *Proc Natl Acad Sci USA* 2000;**97**:7865–70.
37. Vasireddy R, Biswas S. Modeling Gene Regulatory Network in Fission Yeast Cell Cycle Using Hybrid Petri Nets. *Neural Information Processing* 2004;1310–15.
38. Borisuk MT, Tyson JJ. Bifurcation analysis of a model of mitotic control in frog eggs. *J Theor Biol* 1998;**195**:69–85.
39. Ciliberto A, Petrus MJ, Tyson JJ, *et al.* A kinetic model of the cyclin E/Cdk2 developmental timer in *Xenopus laevis* embryos. *Biophys Chem* 2003;**104**:573–89.
40. Ciliberto A, Lukacs A, Toth A, *et al.* Rewiring the exit from mitosis. *Cell Cycle* 2005;**4**:1107–12.
41. Marlovits G, Tyson CJ, Novak B, *et al.* Modeling M-phase control in *Xenopus* oocyte extracts: the surveillance mechanism for unreplicated DNA. *Biophys Chem* 1998;**72**:169–84.
42. Norel R, Agur Z. A model for the adjustment of the mitotic clock by cyclin and MPF levels. *Science* 1991;**251**:1076–8.
43. Novak B, Tyson JJ. Numerical analysis of a comprehensive model of M-phase control in *Xenopus* oocyte extracts and intact embryos. *J Cell Sci* 1993;**106**(Pt 4):1153–68.
44. Zwolak JW, Tyson JJ, Watson LT. Parameter estimation for a mathematical model of the cell cycle in frog eggs. *J Comput Biol* 2005;**12**:48–63.
45. Calzone L, Thieffry D, Tyson JJ, *et al.* Dynamical modeling of syncytial mitotic cycles in *Drosophila* embryos. *Mol Syst Biol* 2007;**3**:131.
46. Ciliberto A, Tyson JJ. Mathematical model for early development of the sea urchin embryo. *Bull Math Biol* 2000;**62**:37–59.
47. Aguda BD. Instabilities in phosphorylation–dephosphorylation cascades and cell cycle checkpoints. *Oncogene* 1999;**18**:2846–51.
48. Alarcon T, Byrne HM, Maini PK. A mathematical model of the effects of hypoxia on the cell-cycle of normal and cancer cells. *J Theor Biol* 2004;**229**:395–411.
49. Bai S, Goodrich D, Thron CD, *et al.* Theoretical and experimental evidence for hysteresis in cell proliferation. *Cell Cycle* 2003;**2**:46–52.
50. Hatzimanikatis V, Lee KH, Bailey JE. A mathematical description of regulation of the G1–S transition of the mammalian cell cycle. *Biotechnol Bioeng* 1999;**65**:631–7.
51. Iwamoto K, Tashima Y, Hamada H, *et al.* Mathematical modeling and sensitivity analysis of G1/S phase in the cell cycle including the DNA-damage signal transduction pathway. *Biosystems* 2008;**94**:109–17.
52. Kohn KW. Functional capabilities of molecular network components controlling the mammalian G1/S cell cycle phase transition. *Oncogene* 1998;**16**:1065–75.
53. Novak B, Tyson JJ. A model for restriction point control of the mammalian cell cycle. *J Theor Biol* 2004;**230**:563–79.
54. Obeyesekere MN, Herbert JR, Zimmerman SO. A model of the G1 phase of the cell cycle incorporating cyclinE/cdk2 complex and retinoblastoma protein. *Oncogene* 1995;**11**:1199–205.
55. Obeyesekere MN, Knudsen ES, Wang JY, *et al.* A mathematical model of the regulation of the G1 phase of Rb+/+ and Rb-/- mouse embryonic fibroblasts and an osteosarcoma cell line. *Cell Prolif* 1997;**30**:171–94.
56. Pfeuty B, David-Pfeuty T, Kaneko K. Underlying principles of cell fate determination during G1 phase of the mammalian cell cycle. *Cell Cycle* 2008;**7**:3246–57.
57. Qu Z, Weiss JN, MacLellan WR. Regulation of the mammalian cell cycle: a model of the G1-to-S transition. *Am J Physiol Cell Physiol* 2003;**284**:C349–64.
58. Swat M, Kel A, Herzog H. Bifurcation analysis of the regulatory modules of the mammalian G1/S transition. *Bioinformatics* 2004;**20**:1506–11.
59. Yang L, Han Z, Robb MacLellan W, *et al.* Linking cell division to cell growth in a spatiotemporal model of the cell cycle. *J Theor Biol* 2006;**241**:120–33.
60. Chassagnole C, Jackson RC, Hussain N, *et al.* Using a mammalian cell cycle simulation to interpret differential kinase inhibition in anti-tumour pharmaceutical development. *Biosystems* 2006;**83**:91–7.
61. Basse B, Baguley BC, Marshall ES, *et al.* A mathematical model for analysis of the cell cycle in cell lines derived from human tumors. *J Math Biol* 2003;**47**:295–312.
62. Collier JR, McInerney D, Schnell S, *et al.* A cell cycle model for somitogenesis: mathematical formulation and numerical simulation. *J Theor Biol* 2000;**207**:305–16.
63. Aguda BD. A quantitative analysis of the kinetics of the G2 DNA damage checkpoint system. *Proc Natl Acad Sci USA* 1999;**96**:11352–7.
64. Csikász-Nagy A, Battogtokh D, Chen KC, *et al.* Analysis of a generic model of eukaryotic cell-cycle regulation. *Biophys J* 2006;**90**:4361–79.

65. Goldbeter A. A minimal cascade model for the mitotic oscillator involving cyclin and cdc2 kinase. *Proc Natl Acad Sci USA* 1991;**88**:9107–11.
66. Gonze D, Goldbeter A. A model for a network of phosphorylation–dephosphorylation cycles displaying the dynamics of dominoes and clocks. *J Theor Biol* 2001;**210**:167–86.
67. Novak B, Csikasz-Nagy A, Gyorffy B, *et al.* Model scenarios for evolution of the eukaryotic cell cycle. *Philos Trans R Soc Lond B Biol Sci* 1998;**353**:2063–76.
68. Pfeuty B, Kaneko K. Minimal requirements for robust cell size control in eukaryotic cells. *Phys Biol* 2007;**4**:194–204.
69. Qu Z, MacLellan WR, Weiss JN. Dynamics of the cell cycle: checkpoints, sizers, and timers. *Biophys J* 2003;**85**:3600–11.
70. Qu ZL, Weiss JN, MacLellan WR. Coordination of cell growth and cell division: a mathematical modeling study. *J Cell Sci* 2004;**117**:4199–207.
71. Thron CD. Mathematical analysis of a model of the mitotic clock. *Science* 1991;**254**:122–3.
72. Thron CD. Bistable biochemical switching and the control of the events of the cell cycle. *Oncogene* 1997;**15**:317–25.
73. Tyson JJ. Modeling the cell division cycle: cdc2 and cyclin interactions. *Proc Natl Acad Sci USA* 1991;**88**:7328–32.
74. Yang L, MacLellan WR, Han Z, *et al.* Multisite phosphorylation and network dynamics of cyclin-dependent kinase signaling in the eukaryotic cell cycle. *Biophys J* 2004;**86**:3432–43.
75. Gardner TS, Dolnik M, Collins JJ. A theory for controlling cell cycle dynamics using a reversibly binding inhibitor. *Proc Natl Acad Sci USA* 1998;**95**:14190–5.
76. Mura I, Csikasz-Nagy A. Stochastic Petri Net extension of a yeast cell cycle model. *J Theor Biol* 2008;**254**:850–60.
77. Sabouri-Ghomi M, Ciliberto A, Kar S, *et al.* Antagonism and bistability in protein interaction networks. *J Theor Biol* 2008;**250**:209–18.
78. Sveiczler A, Tyson JJ, Novak B. A stochastic, molecular model of the fission yeast cell cycle: role of the nucleocytoplasmic ratio in cycle time regulation. *Biophys Chem* 2001;**92**:1–15.
79. Steuer R. Effects of stochasticity in models of the cell cycle: from quantized cycle times to noise-induced oscillations. *J Theor Biol* 2004;**228**:293–301.
80. Zamborszky J, Hong CI, Csikasz-Nagy A. Computational analysis of mammalian cell division gated by a circadian clock: quantized cell cycles and cell size control. *J Biol Rhythms* 2007;**22**:542–53.
81. Lecca P, Priami C. Cell cycle control in eukaryotes: A BioSpi model. *Electron Notes Theoret Comput Sci* 2007;**180**:51–63.
82. Kitano H. Computational systems biology. *Nature* 2002;**420**:206–10.
83. Nurse P. Universal control mechanism regulating onset of M-phase. *Nature* 1990;**344**:503–8.
84. Gilbert D, Fuss H, Gu X, *et al.* Computational methodologies for modelling, analysis and simulation of signalling networks. *Brief Bioinform* 2006;**7**:339–53.
85. Karlebach G, Shamir R. Modelling and analysis of gene regulatory networks. *Nat Rev Mol Cell Biol* 2008;**9**:770–80.
86. Morgan DO. *The Cell Cycle: Principles of Control*. New Science Press: London, 2006.
87. Nurse P. A long twentieth century of the cell cycle and beyond. *Cell* 2000;**100**:71–8.
88. Tyers M. Cell cycle goes global. *Curr Opin Cell Biol* 2004;**16**:602–13.
89. Csikasz-Nagy A, Novak B, Tyson JJ. Reverse engineering models of cell cycle regulation. *Adv Exp Med Biol* 2008;**641**:88–97.
90. Fuss H, Dubitzky W, Downes CS, *et al.* Mathematical models of cell cycle regulation. *Brief Bioinform* 2005;**6**:163–77.
91. Ingolia NT, Murray AW. The ups and downs of modeling the cell cycle. *Curr Biol* 2004;**14**:R771–7.
92. Sible JC, Tyson JJ. Mathematical modeling as a tool for investigating cell cycle control networks. *Methods* 2007;**41**:238–47.
93. Tyson JJ, Novak B. Temporal organization of the cell cycle. *Curr Biol* 2008;**18**:R759–R768.
94. Hartwell LH, Weinert TA. Checkpoints: controls that ensure the order of cell cycle events. *Science* 1989;**246**:629–34.
95. Prescott DM. Relation between growth rate and cell division. III. Changes in nuclear volume and growth rate and prevention of cell division in *Amoeba proteus* resulting from cytoplasmic amputations. *Exp Cell Res* 1956;**11**:94–8.
96. Pomerening JR, Sontag ED, Ferrell JE Jr. Building a cell cycle oscillator: hysteresis and bistability in the activation of Cdc2. *Nat Cell Biol* 2003;**5**:346–51.
97. Sha W, Moore J, Chen K, *et al.* Hysteresis drives cell-cycle transitions in *Xenopus laevis* egg extracts. *Proc Natl Acad Sci USA* 2003;**100**:975–80.
98. Cross FR, Archambault V, Miller M, *et al.* Testing a mathematical model for the yeast cell cycle. *Mol Biol Cell* 2002;**13**:52–70.
99. Queralt E, Lehane C, Novak B, *et al.* Downregulation of PP2A(Cdc55) phosphatase by separase initiates mitotic exit in budding yeast. *Cell* 2006;**125**:719–32.
100. Hanahan D, Weinberg RA. The hallmarks of cancer. *Cell* 2000;**100**:57–70.
101. Novak B, Tyson JJ, Gyorffy B, *et al.* Irreversible cell-cycle transitions are due to systems-level feedback. *Nat Cell Biol* 2007;**9**:724–8.
102. Holt LJ, Krutchinsky AN, Morgan DO. Positive feedback sharpens the anaphase switch. *Nature* 2008;**454**:353–7.
103. Pomerening JR, Kim SY, Ferrell JE Jr. Systems-level dissection of the cell-cycle oscillator: bypassing positive feedback produces damped oscillations. *Cell* 2005;**122**:565–78.
104. Skotheim JM, Di Talia S, Siggia ED, *et al.* Positive feedback of G1 cyclins ensures coherent cell cycle entry. *Nature* 2008;**454**:291–6.
105. Thieffry D. Dynamical roles of biological regulatory circuits. *Brief Bioinform* 2007;**8**:220–5.
106. Gillespie DT. Stochastic simulation of chemical kinetics. *Annu Rev Phys Chem* 2007;**58**:35–55.
107. Bean JM, Siggia ED, Cross FR. Coherence and timing of cell cycle start examined at single-cell resolution. *Mol Cell* 2006;**21**:3–14.



108. Di Talia S, Skotheim JM, Bean JM, *et al.* The effects of molecular noise and size control on variability in the budding yeast cell cycle. *Nature* 2007;**448**:947–51.
109. Flory MR, Lee H, Bonneau R, *et al.* Quantitative proteomic analysis of the budding yeast cell cycle using acid-cleavable isotope-coded affinity tag reagents. *Proteomics* 2006;**6**:6146–57.
110. Ho Y, Gruhler A, Heilbut A, *et al.* Systematic identification of protein complexes in *Saccharomyces cerevisiae* by mass spectrometry. *Nature* 2002;**415**:180–3.
111. Chi A, Huttenhower C, Geer LY, *et al.* Analysis of phosphorylation sites on proteins from *Saccharomyces cerevisiae* by electron transfer dissociation (ETD) mass spectrometry. *Proc Natl Acad Sci USA* 2007;**104**:2193–8.
112. Chi Y, Welcker M, Hizli AA, *et al.* Identification of CDK2 substrates in human cell lysates. *Genome Biol* 2008;**9**:R149.
113. Ptacek J, Devgan G, Michaud G, *et al.* Global analysis of protein phosphorylation in yeast. *Nature* 2005;**438**:679–84.
114. Gauthier NP, Larsen ME, Wernersson R, *et al.* Cyclebase.org – a comprehensive multi-organism online database of cell-cycle experiments. *Nucleic Acids Res* 2008;**36**:D854–9.
115. Breitkreutz BJ, Stark C, Reguly T, *et al.* The BioGRID Interaction Database: 2008 update. *Nucleic Acids Res* 2008;**36**:D637–40.
116. von Mering C, Jensen LJ, Snel B, *et al.* STRING: known and predicted protein-protein associations, integrated and transferred across organisms. *Nucleic Acids Res* 2005;**33**:D433–7.
117. Linding R, Jensen LJ, Ostheimer GJ, *et al.* Systematic discovery of in vivo phosphorylation networks. *Cell* 2007;**129**:1415–26.
118. Calzone L, Gelay A, Zinovyev A, *et al.* A comprehensive modular map of molecular interactions in RB/E2F pathway. *Mol Syst Biol* 2008;**4**:173.
119. Kohn KW. Molecular interaction map of the mammalian cell cycle control and DNA repair systems. *Mol Biol Cell* 1999;**10**:2703–34.
120. Cho RJ, Campbell MJ, Winzeler EA, *et al.* A genome-wide transcriptional analysis of the mitotic cell cycle. *Mol Cell* 1998;**2**:65–73.
121. Spellman PT, Sherlock G, Zhang MQ, *et al.* Comprehensive identification of cell cycle-regulated genes of the yeast *Saccharomyces cerevisiae* by microarray hybridization. *Mol Biol Cell* 1998;**9**:3273–97.
122. Chang WC, Li CW, Chen BS. Quantitative inference of dynamic regulatory pathways via microarray data. *BMC Bioinformatics* 2005;**6**:44.
123. Chen HC, Lee HC, Lin TY, *et al.* Quantitative characterization of the transcriptional regulatory network in the yeast cell cycle. *Bioinformatics* 2004;**20**:1914–27.
124. Cokus S, Rose S, Haynor D, *et al.* Modelling the network of cell cycle transcription factors in the yeast *Saccharomyces cerevisiae*. *BMC Bioinformatics* 2006;**7**:381.
125. Tsai HK, Lu HH, Li WH. Statistical methods for identifying yeast cell cycle transcription factors. *Proc Natl Acad Sci USA* 2005;**102**:13532–7.
126. Simon I, Barnett J, Hannett N, *et al.* Serial regulation of transcriptional regulators in the yeast cell cycle. *Cell* 2001;**106**:697–708.
127. Cheng C, Li LM. Systematic identification of cell cycle regulated transcription factors from microarray time series data. *BMC Genomics* 2008;**9**:116.
128. Wu WS, Li WH. Systematic identification of yeast cell cycle transcription factors using multiple data sources. *BMC Bioinformatics* 2008;**9**:522.
129. Jensen LJ, Saric J, Bork P. Literature mining for the biologist: from information retrieval to biological discovery. *Nat Rev Genet* 2006;**7**:119–29.
130. Roberts PM. Mining literature for systems biology. *Brief Bioinform* 2006;**7**:399–406.
131. Hillenmeyer ME, Fung E, Wildenhain J, *et al.* The chemical genomic portrait of yeast: uncovering a phenotype for all genes. *Science* 2008;**320**:362–5.
132. Tong AH, Evangelista M, Parsons AB, *et al.* Systematic genetic analysis with ordered arrays of yeast deletion mutants. *Science* 2001;**294**:2364–8.
133. Tong AH, Lesage G, Bader GD, *et al.* Global mapping of the yeast genetic interaction network. *Science* 2004;**303**:808–13.
134. Moriya H, Shimizu-Yoshida Y, Kitano H. In vivo robustness analysis of cell division cycle genes in *Saccharomyces cerevisiae*. *PLoS Genet* 2006;**2**:e111.
135. Sopko R, Huang D, Preston N, *et al.* Mapping pathways and phenotypes by systematic gene overexpression. *Mol Cell* 2006;**21**:319–30.
136. Kitano H, Funahashi A, Matsuoka Y, *et al.* Using process diagrams for the graphical representation of biological networks. *Nat Biotechnol* 2005;**23**:961–6.
137. Hucka M, Finney A, Sauro HM, *et al.* The systems biology markup language (SBML): a medium for representation and exchange of biochemical network models. *Bioinformatics* 2003;**19**:524–31.
138. Le Novère N, Bornstein B, Broicher A, *et al.* BioModels Database: a free, centralized database of curated, published, quantitative kinetic models of biochemical and cellular systems. *Nucleic Acids Res* 2006;**34**:D689–91.
139. Olivier BG, Snoep JL. Web-based kinetic modelling using JWS Online. *Bioinformatics* 2004;**20**:2143–4.
140. Alfieri R, Merelli I, Mosca E, *et al.* A data integration approach for cell cycle analysis oriented to model simulation in systems biology. *BMC Syst Biol* 2007;**1**:35.
141. Dematte L, Priami C, Romanel A. The Beta Workbench: a computational tool to study the dynamics of biological systems. *Brief Bioinform* 2008;**9**:437–49.
142. Ermentrout B. *Simulating, Analyzing, and Animating Dynamical Systems: A Guide to XPPAUT for Researchers and Students*. Philadelphia: SIAM, 2002.
143. Schmidt H, Jirstrand M. Systems biology toolbox for MATLAB: a computational platform for research in systems biology. *Bioinformatics* 2006;**22**:514–5.
144. Vass M, Allen N, Shaffer CA, *et al.* the JigCell model builder and run manager. *Bioinformatics* 2004;**20**:3680–1.
145. Panning T, Watson L, Allen N, *et al.* Deterministic parallel global parameter estimation for a model of the budding yeast cell cycle. *Journal of Global Optimization* 2008;**40**:719–38.
146. Hoops S, Sahle S, Gauges R, *et al.* COPASI—a COmplex PATHway Simulator. *Bioinformatics* 2006;**22**:3067–74.

147. Lecca P, Palmisano A, Priami C. A new probabilistic generative model of parameter inference in biochemical networks. *Proceedings of the 2009 ACM Symposium on Applied Computing*. Association for Computing Machinery, New York, 2009.
148. Saez-Rodriguez J, Goldsipe A, Muhlich J, et al. Flexible informatics for linking experimental data to mathematical models via DataRail. *Bioinformatics* 2008;**24**:840–7.
149. Zi Z, Klipp E. SBML-PET: a systems biology markup language-based parameter estimation tool. *Bioinformatics* 2006;**22**:2704–5.
150. Zwolak JW, Tyson JJ, Watson LT. Globally optimised parameters for a model of mitotic control in frog egg extracts. *Syst Biol* 2005;**152**:81–92.
151. Cline MS, Smoot M, Cerami E, et al. Integration of biological networks and gene expression data using Cytoscape. *Nat Protoc* 2007;**2**:2366–82.
152. Aldridge BB, Burke JM, Lauffenburger DA, et al. Physicochemical modelling of cell signalling pathways. *Nat Cell Biol* 2006;**8**:1195–203.
153. Andrecut M, Huang S, Kauffman SA. Heuristic approach to sparse approximation of gene regulatory networks. *J Comput Biol* 2008;**15**:1173–86.
154. Fujita A, Sato JR, Garay-Malpartida HM, et al. Modeling gene expression regulatory networks with the sparse vector autoregressive model. *BMC Syst Biol* 2007;**1**:39.
155. Nelander S, Wang W, Nilsson B, et al. Models from experiments: combinatorial drug perturbations of cancer cells. *Mol Syst Biol* 2008;**4**:216.
156. Kholodenko BN. Cell-signalling dynamics in time and space. *Nat Rev Mol Cell Biol* 2006;**7**:165–76.
157. Slepchenko BM, Schaff JC, Macara I, et al. Quantitative cell biology with the Virtual Cell. *Trends Cell Biol* 2003;**13**:570–6.
158. Borghans JA, de Boer RJ, Segel LA. Extending the quasi-steady state approximation by changing variables. *Bull Math Biol* 1996;**58**:43–63.
159. Barik D, Paul MR, Baumann WT, et al. Stochastic simulation of enzyme-catalyzed reactions with disparate timescales. *Biophys J* 2008;**95**:3563–74.
160. Ciliberto A, Capuani F, Tyson JJ. Modeling networks of coupled enzymatic reactions using the total quasi-steady state approximation. *PLoS Comput Biol* 2007;**3**:e45.
161. Turányi T. Sensitivity analysis of complex kinetic systems. Tools and applications. *Journal of Mathematical Chemistry* 1990;**5**:203–48.
162. Conradi C, Flockerzi D, Raisch J, et al. Subnetwork analysis reveals dynamic features of complex (bio)chemical networks. *Proc Natl Acad Sci USA* 2007;**104**:19175–80.
163. Ballarini P, Mazza T, Palmisano A, et al. Studying irreversible transitions in a model of cell cycle regulation. *Electron Notes Theoret Comput Sci* 2009; in press.
164. Calzone L, Fages F, Soliman S. BIOCHAM: an environment for modeling biological systems and formalizing experimental knowledge. *Bioinformatics* 2006;**22**:1805–7.
165. Heath J, Kwiatkowska M, Norman G, et al. Probabilistic model checking of complex biological pathways. *Theoretical Computer Science* 2008;**391**:239–57.
166. Mardare R, Priami C, Quaglia P, et al. Model checking biological systems described using ambient calculus. *Comput Methods Syst Biol* 2005;**3082**:85–103.
167. Monteiro PT, Ropers D, Mateescu R, et al. Temporal logic patterns for querying dynamic models of cellular interaction networks. *Bioinformatics* 2008;**24**:i227–i233.
168. Hlavacek WS, Faeder JR, Blinov ML, et al. Rules for modeling signal-transduction systems. *Sci STKE* 2006; **2006**:re6.
169. Regev A, Shapiro E. Cells as computation. *Nature* 2002; **419**:343.
170. Ciocchetta F, Hillston J. Process algebras in systems biology. *Lecture Notes Comput Sci* 2008;**5016**:265–312.
171. Phillips A, Cardelli L. A correct abstract machine for the stochastic pi-calculus. *Proceedings of Bioconcur 2004*. London: Concurrent Models in Molecular Biology, 2005.
172. Priami C, Quaglia P. Modelling the dynamics of biosystems. *Brief Bioinform* 2004;**5**:259–69.
173. Priami C, Quaglia P. Beta binders for biological interactions. *Comput Methods Syst Biol* 2005;**3082**:20–33.
174. Kim SY, Song EJ, Lee KJ, et al. Multisite M-phase phosphorylation of Xenopus Wee1A. *Mol Cell Biol* 2005; **25**:10580–90.
175. de Lichtenberg U, Jensen LJ, Brunak S, et al. Dynamic complex formation during the yeast cell cycle. *Science* 2005; **307**:724–7.
176. Dematte L, Priami C, Romanel A. Modelling and simulation of biological processes in BlenX, SIGMETRICS Perform. *Eval Rev* 2008;**35**:32–9.
177. Altinok A, Levi F, Goldbeter A. A cell cycle automaton model for probing circadian patterns of anticancer drug delivery. *Adv Drug Deliv Rev* 2007;**59**:1036–53.
178. Bernard S, Herzel H. Why do cells cycle with a 24 hour period? *Genome Inform* 2006;**17**:72–9.
179. Obeyesekere MN, Tecarro E, Lozano G. Model predictions of MDM2 mediated cell regulation. *Cell Cycle* 2004;**3**:655–61.
180. Fuss H, Dubitzky W, Downes S, et al. Bistable switching and excitable behaviour in the activation of Src at mitosis. *Bioinformatics* 2006;**22**:e158–e165.
181. Klipp E, Nordlander B, Kruger R, et al. Integrative model of the response of yeast to osmotic shock. *Nat Biotechnol* 2005;**23**:975–82.
182. Kofahl B, Klipp E. Modelling the dynamics of the yeast pheromone pathway. *Yeast* 2004;**21**:831–50.
183. Kuepfer L, Peter M, Sauer U, et al. Ensemble modeling for analysis of cell signaling dynamics. *Nat Biotechnol* 2007; **25**:1001–6.
184. Schaber J, Kofahl B, Kowald A, et al. A modelling approach to quantify dynamic crosstalk between the pheromone and the starvation pathway in baker's yeast. *FEBS J* 2006;**273**:3520–33.
185. Schoeberl B, Eichler-Jonsson C, Gilles ED, et al. Computational modeling of the dynamics of the MAP kinase cascade activated by surface and internalized EGF receptors. *Nat Biotechnol* 2002;**20**:370–5.
186. Wang X, Hao N, Dohlman HG, et al. Bistability, stochasticity, and oscillations in the mitogen-activated protein kinase cascade. *Biophys J* 2006;**90**:1961–78.
187. Hayles J, Nurse P. A journey into space. *Nat Rev Mol Cell Biol* 2001;**2**:647–56.

188. Barre B, Perkins ND. A cell cycle regulatory network controlling NF- $\kappa$ B subunit activity and function. *EMBO J* 2007;**26**:4841–55.
189. Kastan MB, Bartek J. Cell-cycle checkpoints and cancer. *Nature* 2004;**432**:316–23.
190. Altschuler SJ, Angenent SB, Wang Y, *et al.* On the spontaneous emergence of cell polarity. *Nature* 2008;**454**:886–9.
191. Csikász-Nagy A, Györfy B, Alt W, *et al.* Spatial controls for growth zone formation during the fission yeast cell cycle. *Yeast* 2008;**25**:59–69.
192. Ihekwaba AE, Wilkinson SJ, Waithe D, *et al.* Bridging the gap between in silico and cell-based analysis of the nuclear factor- $\kappa$ B signaling pathway by in vitro studies of IKK2. *FEBS J* 2007;**274**:1678–90.
193. Bentele M, Lavrik I, Ulrich M, *et al.* Mathematical modeling reveals threshold mechanism in CD95-induced apoptosis. *J Cell Biol* 2004;**166**:839–51.
194. Anderson AR, Rejniak KA, Gerlee P, *et al.* Microenvironment driven invasion: a multiscale multi-model investigation. *J Math Biol* 2009;**58**:579–624.
195. Chauhan A, Legewie S, Westermark PO, *et al.* A mesoscale model of G1/S phase transition in liver regeneration. *J Theor Biol* 2008;**252**:465–73.
196. Ribba B, Colin T, Schnell S. A multiscale mathematical model of cancer, and its use in analyzing irradiation therapies. *Theor Biol Med Model* 2006;**3**:7.
197. Zhang L, Wang Z, Sagotsky JA, *et al.* Multiscale agent-based cancer modeling. *J Math Biol* 2009;**58**:545–559.
198. Anderson AR, Quaranta V. Integrative mathematical oncology. *Nat Rev Cancer* 2008;**8**:227–34.
199. Araujo RP, McElwain DL. A history of the study of solid tumour growth: the contribution of mathematical modelling. *Bull Math Biol* 2004;**66**:1039–91.
200. Byrne HM, Alarcon T, Owen MR, *et al.* Modelling aspects of cancer dynamics: a review. *Philos Trans R Soc A: Math Phys Eng Sci* 2006;**364**:1563–78.
201. Preziosi L. *Cancer Modelling and Simulation*. London: CRC Press, 2003.
202. Byrne H, Drasdo D. Individual-based and continuum models of growing cell populations: a comparison. *J Math Biol* 2009;**58**:657–687.
203. Sherratt JA, Chaplain MA. A new mathematical model for avascular tumour growth. *J Math Biol* 2001;**43**:291–312.
204. Duvdevani-Bar S, Segel L. On topological simulations in developmental biology. *J Theoret Biol* 1994;**166**:33–50.
